# Supplementary material for: A strongly coupled 3D SnS2@Ti3C2Tx heterojunction with vacancies for high-efficiency sodium storage
Source: Royal Society of Chemistry journal article supplement (doi:10.1039/d3nj05137d), 2023-12-14
Supplement: d3nj05137d1.pdf [file d3nj05137d1.pdf]

## Supporting Information

### **Strongly Coupled 3D SnS<sub>2</sub>@Ti<sub>3</sub>C<sub>2</sub>T<sub>x</sub> heterojunction with vacancies for high-efficiency sodium storage**

Weilin Sheng<sup>1, 2</sup>, Ju Yang<sup>1, 2</sup>, Guanglu Jiang<sup>1, 2</sup>, Najun Liu<sup>1, 2</sup>, Huili Peng<sup>1, 2</sup>, Xiuwen Zheng<sup>2, 3\*</sup>, Xiaolei Jiang<sup>1, 2\*</sup>

<sup>1</sup> School of Chemistry and Chemical Engineering, Linyi University, Linyi, 276000, PR China.

<sup>2</sup> Key Laboratory of Advanced Biomaterials and Nanomedicine in Universities of Shandong, Linyi University, Linyi, 276000, PR China.

<sup>3</sup> Qilu Normal University, Jinan, 250200, PR China.

*Corresponding authors:*

*E-mail address:* zhengxiuwen@lyu.edu.cn ,

*jiangxiaolei@lyu.edu.cn*

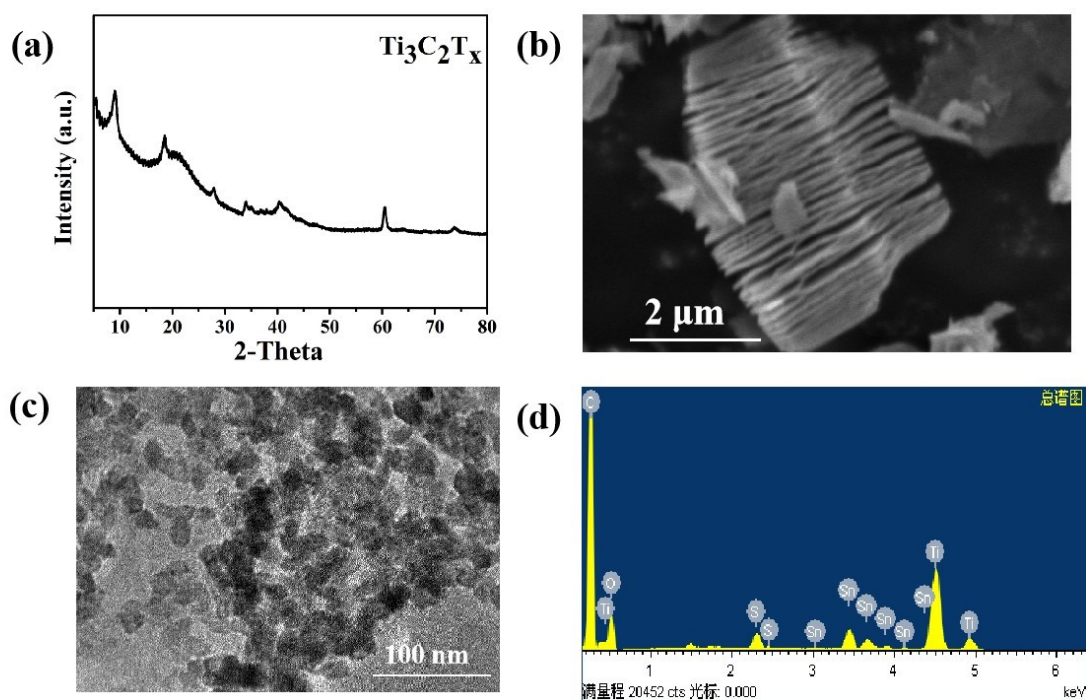

**Fig. S1** (a) The XRD pattern and (b) SEM of  $Ti_3C_2T_x$ . (c) TEM of  $SnS_2$ . (d) TEM-EDS of  $SnS_2@Ti_3C_2T_x$  composites.

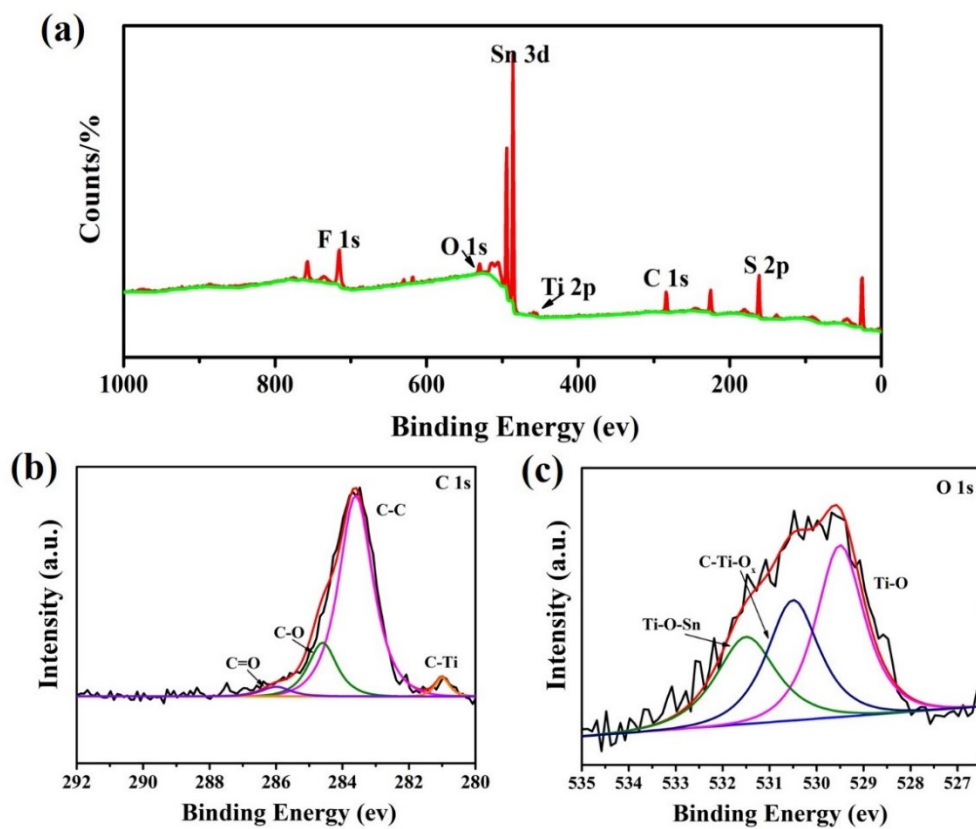

**Fig. S2** XPS spectra of (a) full range, (b) C1s and (c) O1s of  $SnS_2@Ti_3C_2T_x$ .

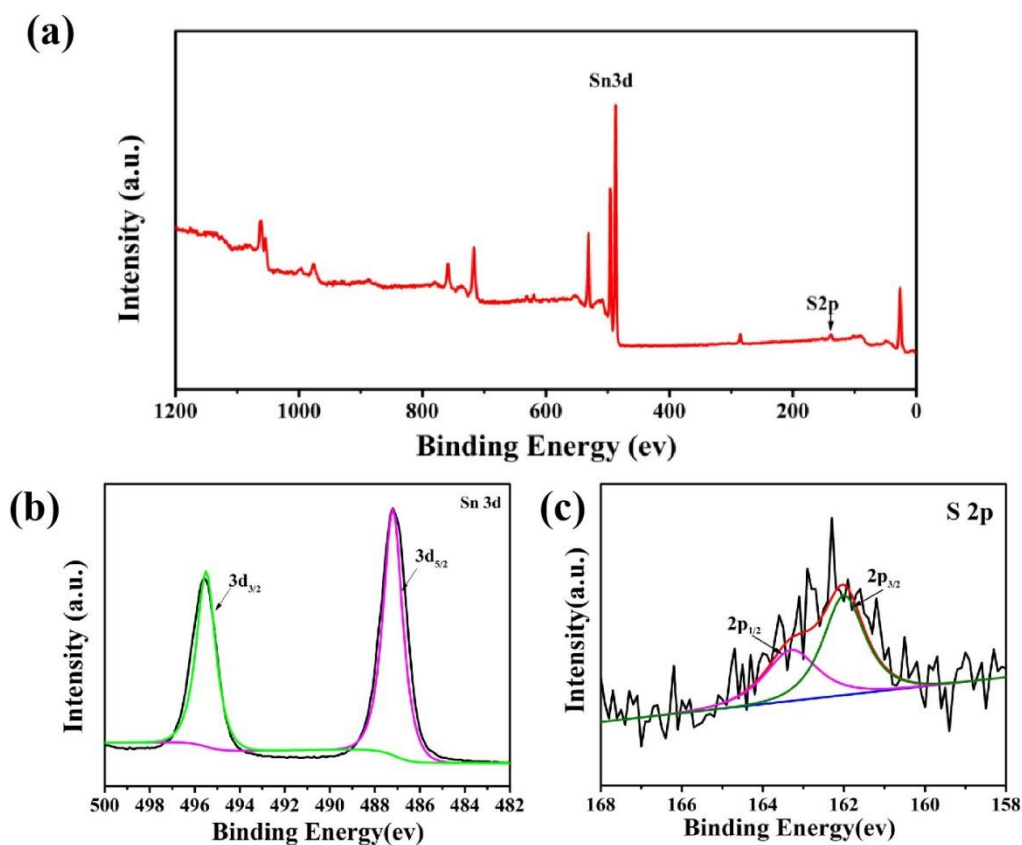

**Fig. R3** XPS spectra of (a) full range, (b) Sn3d and (c) S2p of SnS<sub>2</sub>.

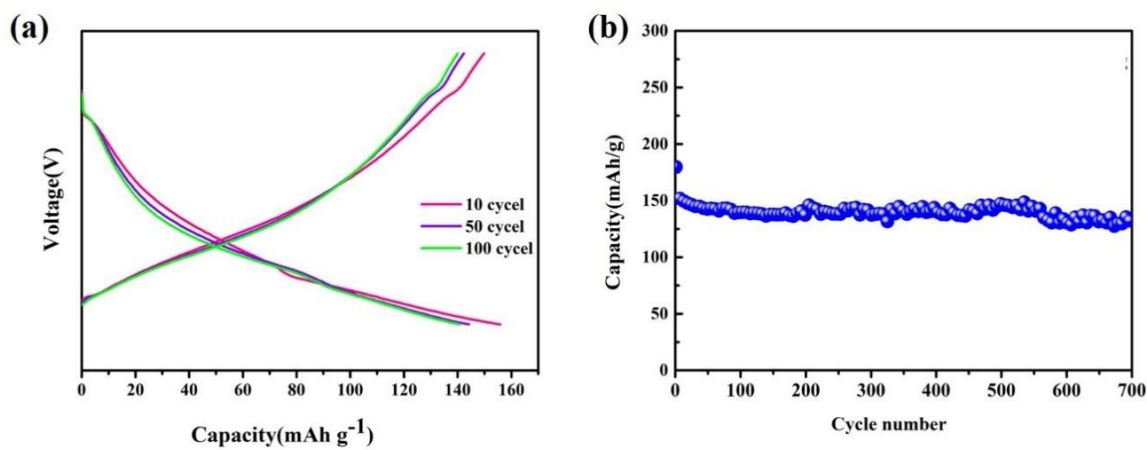

**Fig. S4** (a) Charge-discharge curves and (b) cycling performance of SnS<sub>2</sub>@Ti<sub>3</sub>C<sub>2</sub>T<sub>x</sub> at a current density of 200 mA g<sup>-1</sup>.

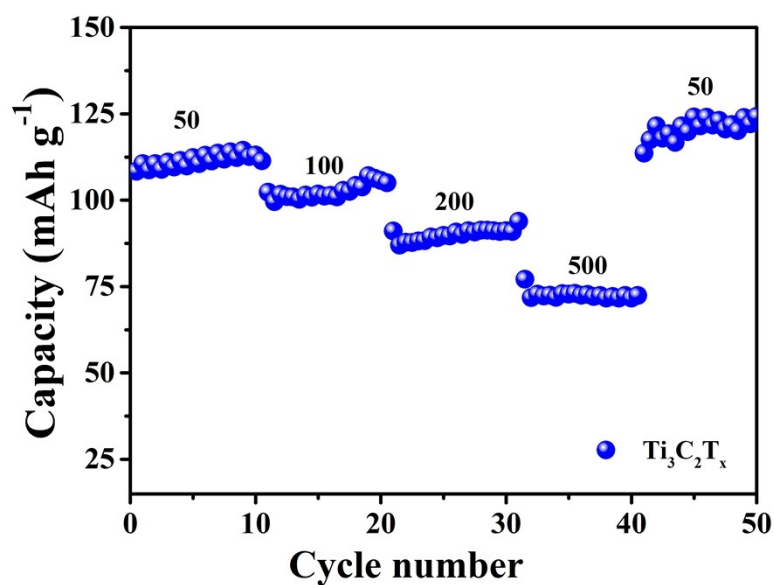

**Fig. S5** The rate performance of  $\text{Ti}_3\text{C}_2\text{T}_x$  at different current densities.

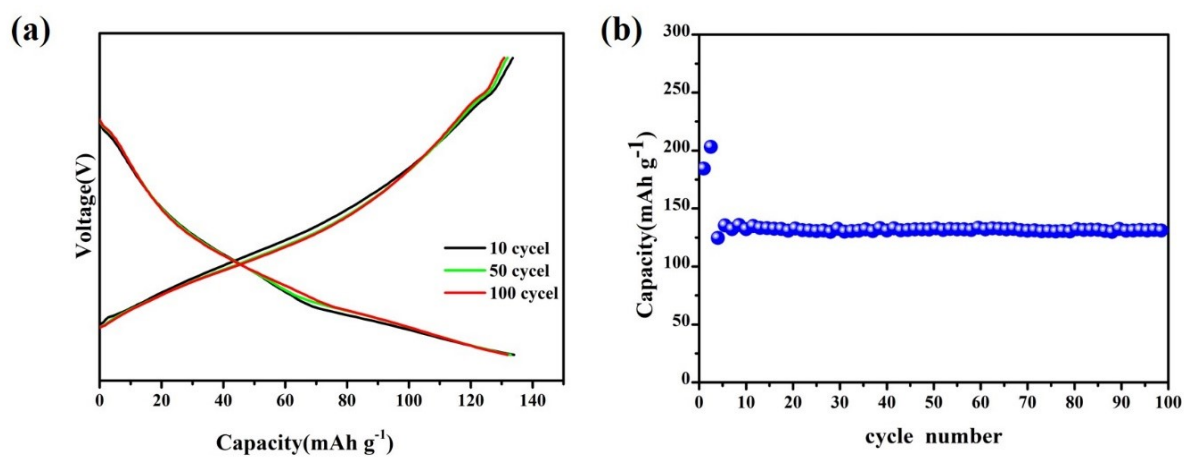

**Fig. S6** (a) Charge-discharge curves and (b) cycling performance of  $\text{SnS}_2@\text{Ti}_3\text{C}_2\text{T}_x$  at a current density of  $500 \text{ mA g}^{-1}$ .

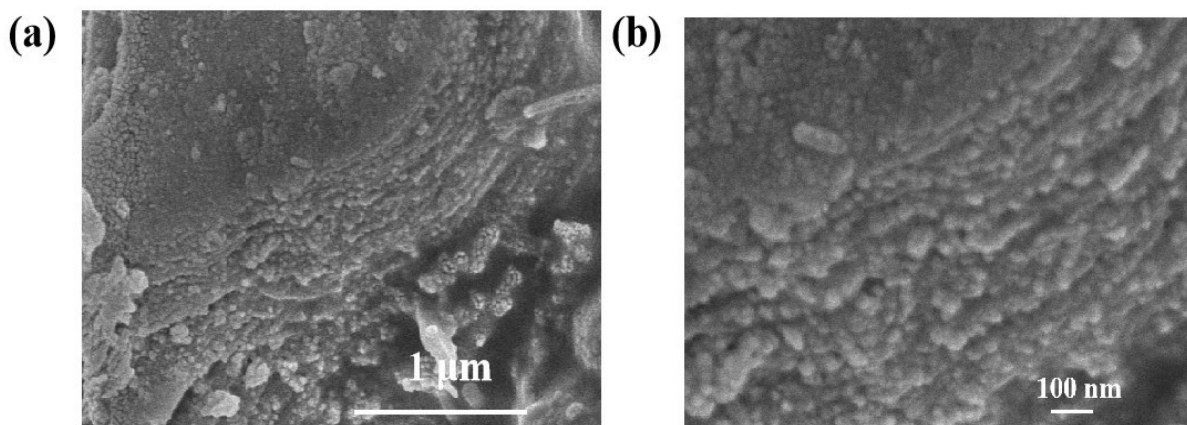

**Fig. S7** (a-b) SEM of  $\text{SnS}_2@\text{Ti}_3\text{C}_2\text{T}_x$  after 1000 cycles at  $500 \text{ mA g}^{-1}$ .

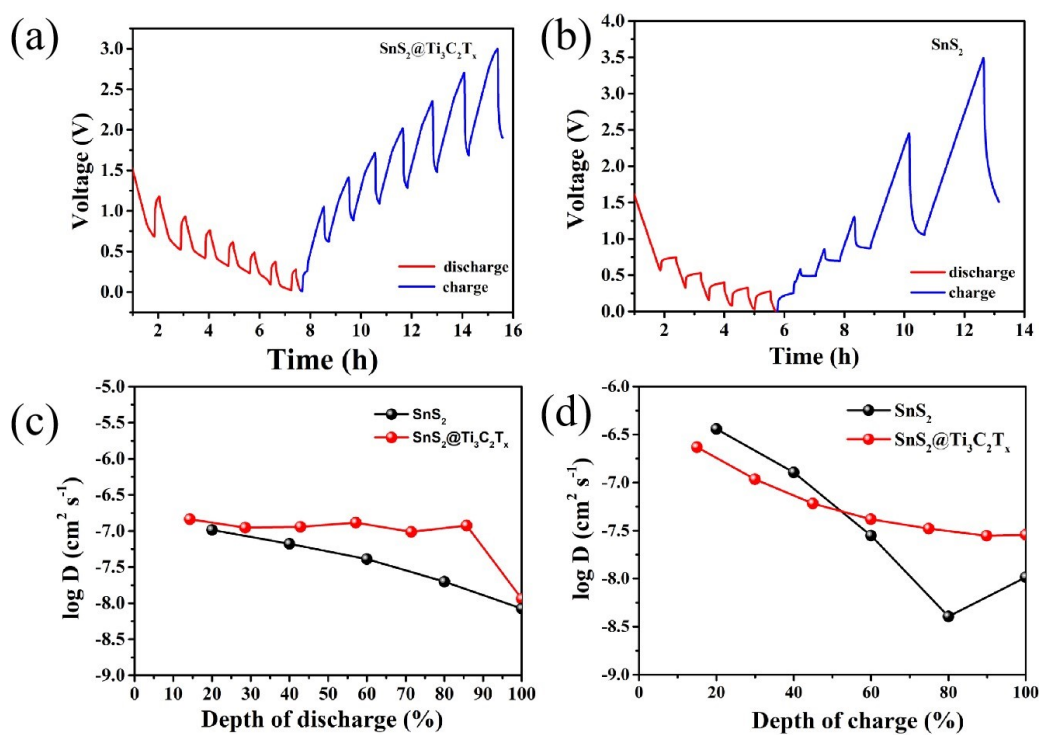

**Fig. S8** (a-b) The GITT profiles of  $\text{SnS}_2@\text{Ti}_3\text{C}_2\text{T}_x$  and  $\text{SnS}_2$ . (c-d) Their corresponding diffusion coefficients of  $\text{Na}^+$  calculated from the GITT tests.

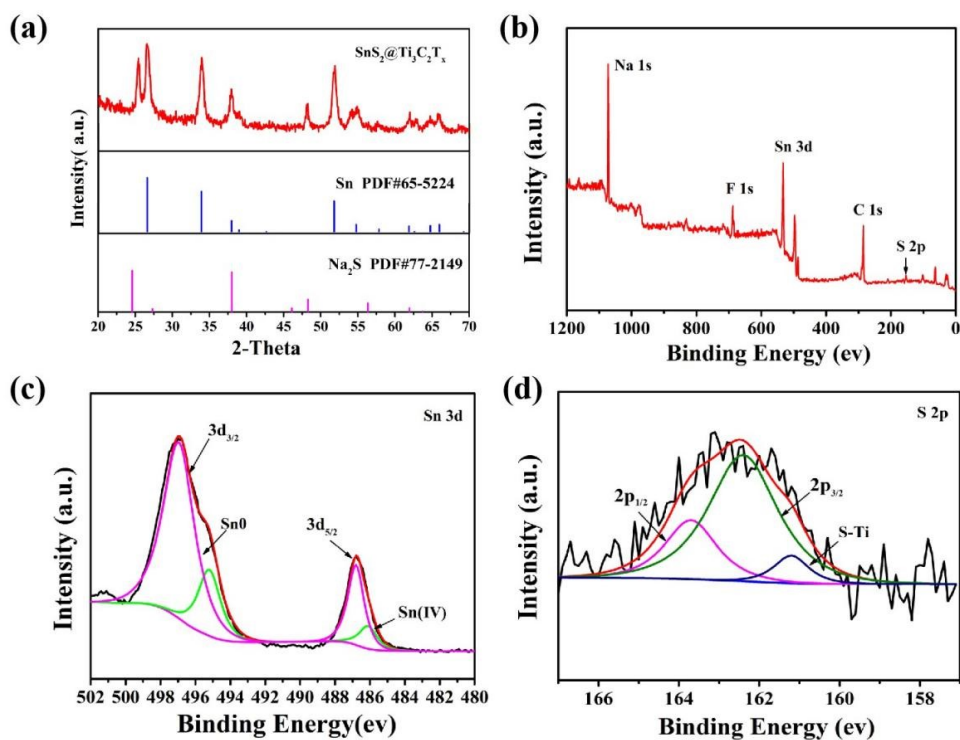

**Fig. S9** (a) The XRD pattern of  $\text{SnS}_2@\text{Ti}_3\text{C}_2\text{T}_x$  after the first complete discharge. (b-c) XPS spectra of full range, Sn3d and S2p of  $\text{SnS}_2@\text{Ti}_3\text{C}_2\text{T}_x$  after the first complete discharge.

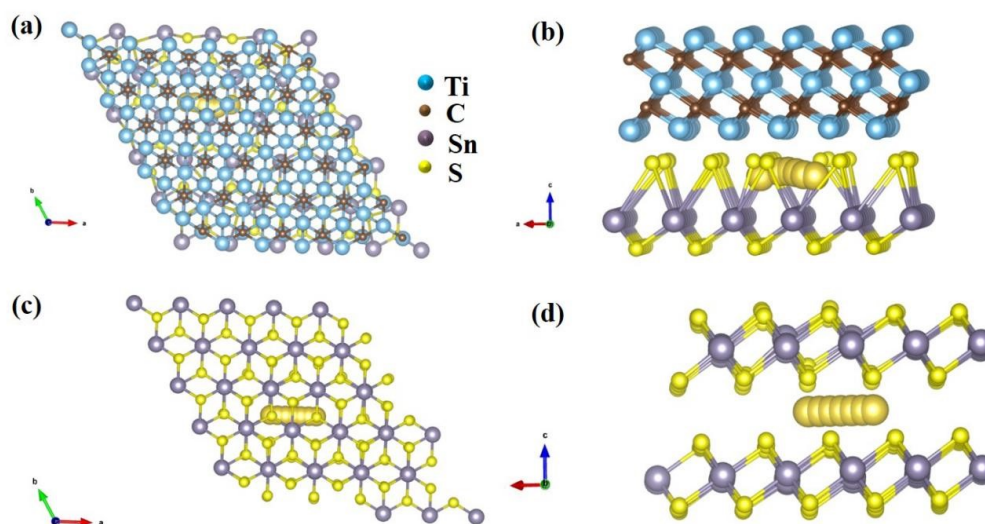

**Fig. S10** (a) Diffusion path model of sodium ion in  $\text{SnS}_2@\text{Ti}_3\text{C}_2\text{T}_x$  and (b) corresponding magnification model diagram. (c) Diffusion path model of sodium ion in  $\text{SnS}_2$  and (d) corresponding magnification computational model.
